# Supplementary material
Source: Springer Nature journal article supplement (https://www.springermedizin.de/resource/supplementary/12885_2009_2413_MOESM5_ESM.pdf/9461232)

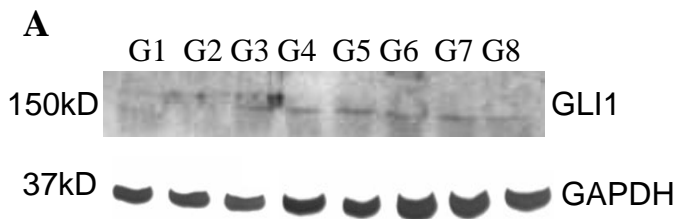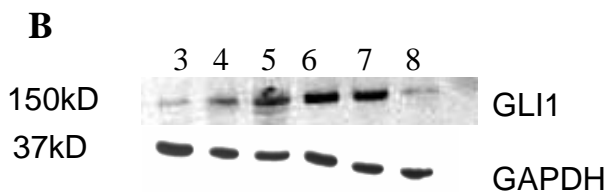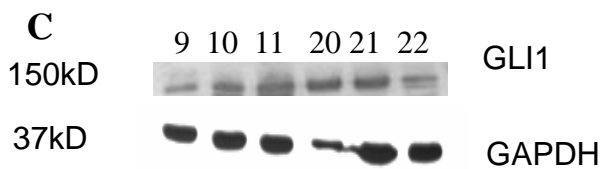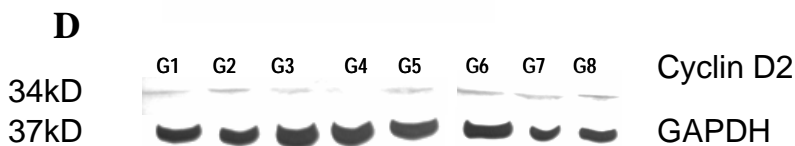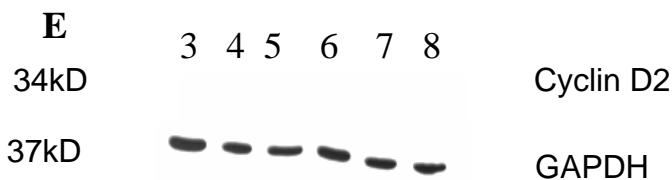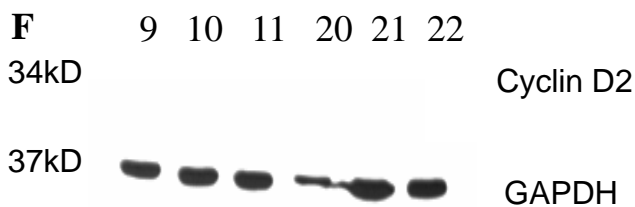

Supplement: MOESM5 [file 9461232]
